# Supplementary material for: The Development of Novel Near-Infrared (NIR) Tetraarylazadipyrromethene Fluorescent Dyes
Source: Materials (Basel). 2013 May 6;6(5):1779–88. doi: 10.3390/ma6051779 (PMC5452499; doi:10.3390/ma6051779)

## Supporting Information

**Table S1.** Spectroscopic properties and identification data of AZA compounds. \*Purity was calculated at 254 nm and some of the impurity was identified as decomposed (-BF<sub>2</sub>) byproduct with no effect on QY.

| ID      | Abs (nm) | Em (nm) | M.W.   | Mass[M+H] <sup>+</sup>     | QY   | Purity* (%) |
|---------|----------|---------|--------|----------------------------|------|-------------|
| AZA-420 | 703      | 747     | 839.5  | 840.5                      | 0.10 | 80          |
| AZA-20  | 707      | 756     | 837.8  | 838.4                      | 0.18 | 79          |
| AZA-24  | 703      | 751     | 967.9  | 484.8:[M+2H] <sup>2+</sup> | 0.28 | 85          |
| AZA-33  | 703      | 749     | 877.8  | 878.8                      | 0.26 | 88          |
| AZA-74  | 710      | 755     | 877.8  | 878.9                      | 0.13 | 86          |
| AZA-77  | 706      | 753     | 877.8  | 878.9                      | 0.21 | 78          |
| AZA-78  | 707      | 755     | 873.3  | 874.2                      | 0.12 | 90          |
| AZA-80  | 707      | 756     | 893.7  | 447.8:[M+2H] <sup>2+</sup> | 0.27 | 92          |
| AZA-101 | 707      | 755     | 849.8  | 850.4                      | 0.28 | 88          |
| AZA-102 | 710      | 756     | 909.8  | 910.4                      | 0.17 | 86          |
| AZA-107 | 703      | 745     | 988.0  | 988.8                      | 0.30 | 78          |
| AZA-109 | 710      | 748     | 933.9  | 467.8:[M+2H] <sup>2+</sup> | 0.12 | 87          |
| AZA-141 | 707      | 753     | 867.8  | 868.4                      | 0.25 | 89          |
| AZA-166 | 707      | 754     | 833.8  | 834.4                      | 0.10 | 77          |
| AZA-182 | 707      | 749     | 781.7  | 782.4                      | 0.22 | 91          |
| AZA-188 | 706      | 752     | 809.8  | 810.4                      | 0.11 | 91          |
| AZA-199 | 710      | 753     | 809.8  | 810.4                      | 0.09 | 86          |
| AZA-206 | 704      | 748     | 781.7  | 782.4                      | 0.21 | 88          |
| AZA-212 | 708      | 753     | 807.7  | 808.4                      | 0.27 | 87          |
| AZA-220 | 703      | 757     | 857.3  | 858.3                      | 0.12 | 97          |
| AZA-221 | 714      | 759     | 890.6  | 891.4                      | 0.21 | 78          |
| AZA-223 | 714      | 745     | 991.9  | 496.9:[M+2H] <sup>2+</sup> | 0.07 | 79          |
| AZA-266 | 707      | 746     | 969.9  | 970.6                      | 0.15 | 88          |
| AZA-271 | 708      | 757     | 777.7  | 778.4                      | 0.15 | 65          |
| AZA-283 | 711      | 759     | 909.8  | 910.5                      | 0.12 | 59          |
| AZA-353 | 710      | 759     | 944.0  | 472.9:[M+2H] <sup>2+</sup> | 0.24 | 79          |
| AZA-368 | 707      | 747     | 1096.3 | 1097.5                     | 0.10 | 90          |
| AZA-375 | 711      | 756     | 857.7  | 858.6                      | 0.23 | 86          |
| AZA-383 | 705      | 743     | 779.7  | 780.8                      | 0.18 | 88          |
| AZA-387 | 702      | 743     | 881.8  | 882.4                      | 0.34 | 75          |
| AZA-396 | 707      | 754     | 849.8  | 850.4                      | 0.19 | 91          |
| AZA-398 | 710      | 755     | 849.8  | 850.3                      | 0.16 | 87          |
| AZA-401 | 703      | 748     | 823.7  | 824.4                      | 0.18 | 69          |
| AZA-405 | 705      | 754     | 885.8  | 886.4                      | 0.14 | 73          |
| AZA-417 | 703      | 744     | 809.7  | 810.3                      | 0.27 | 86          |
| AZA-419 | 707      | 737     | 781.4  | 781.2                      | 0.28 | 85          |
| AZA-426 | 708      | 752     | 873.8  | 874.8                      | 0.11 | 89          |
| AZA-462 | 704      | 745     | 805.8  | 806.4                      | 0.22 | 94          |
| AZA-583 | 703      | 742     | 753.7  | 754.4                      | 0.23 | 87          |
| AZA-637 | 710      | 752     | 979.9  | 980.6                      | 0.20 | 85          |

**Figure S1.** Representative LC-MS chromatogram.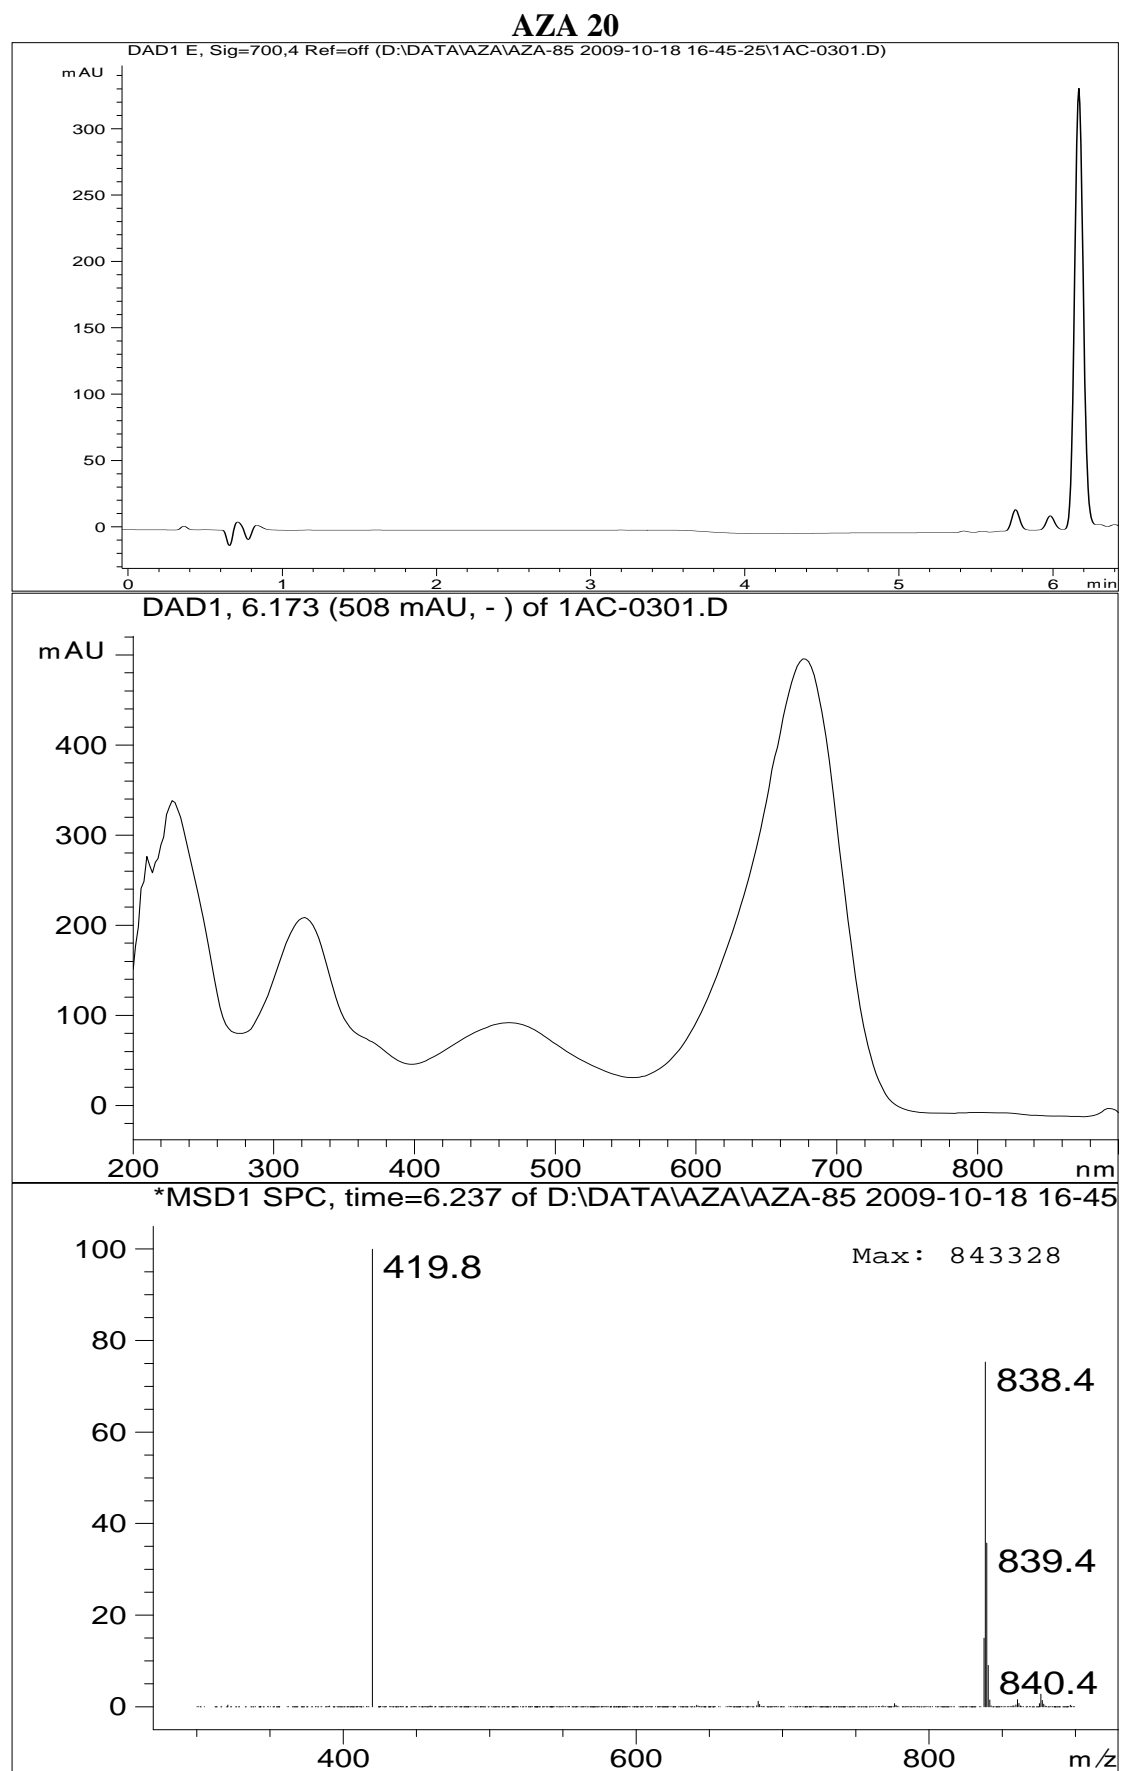

Figure S1. Cont.

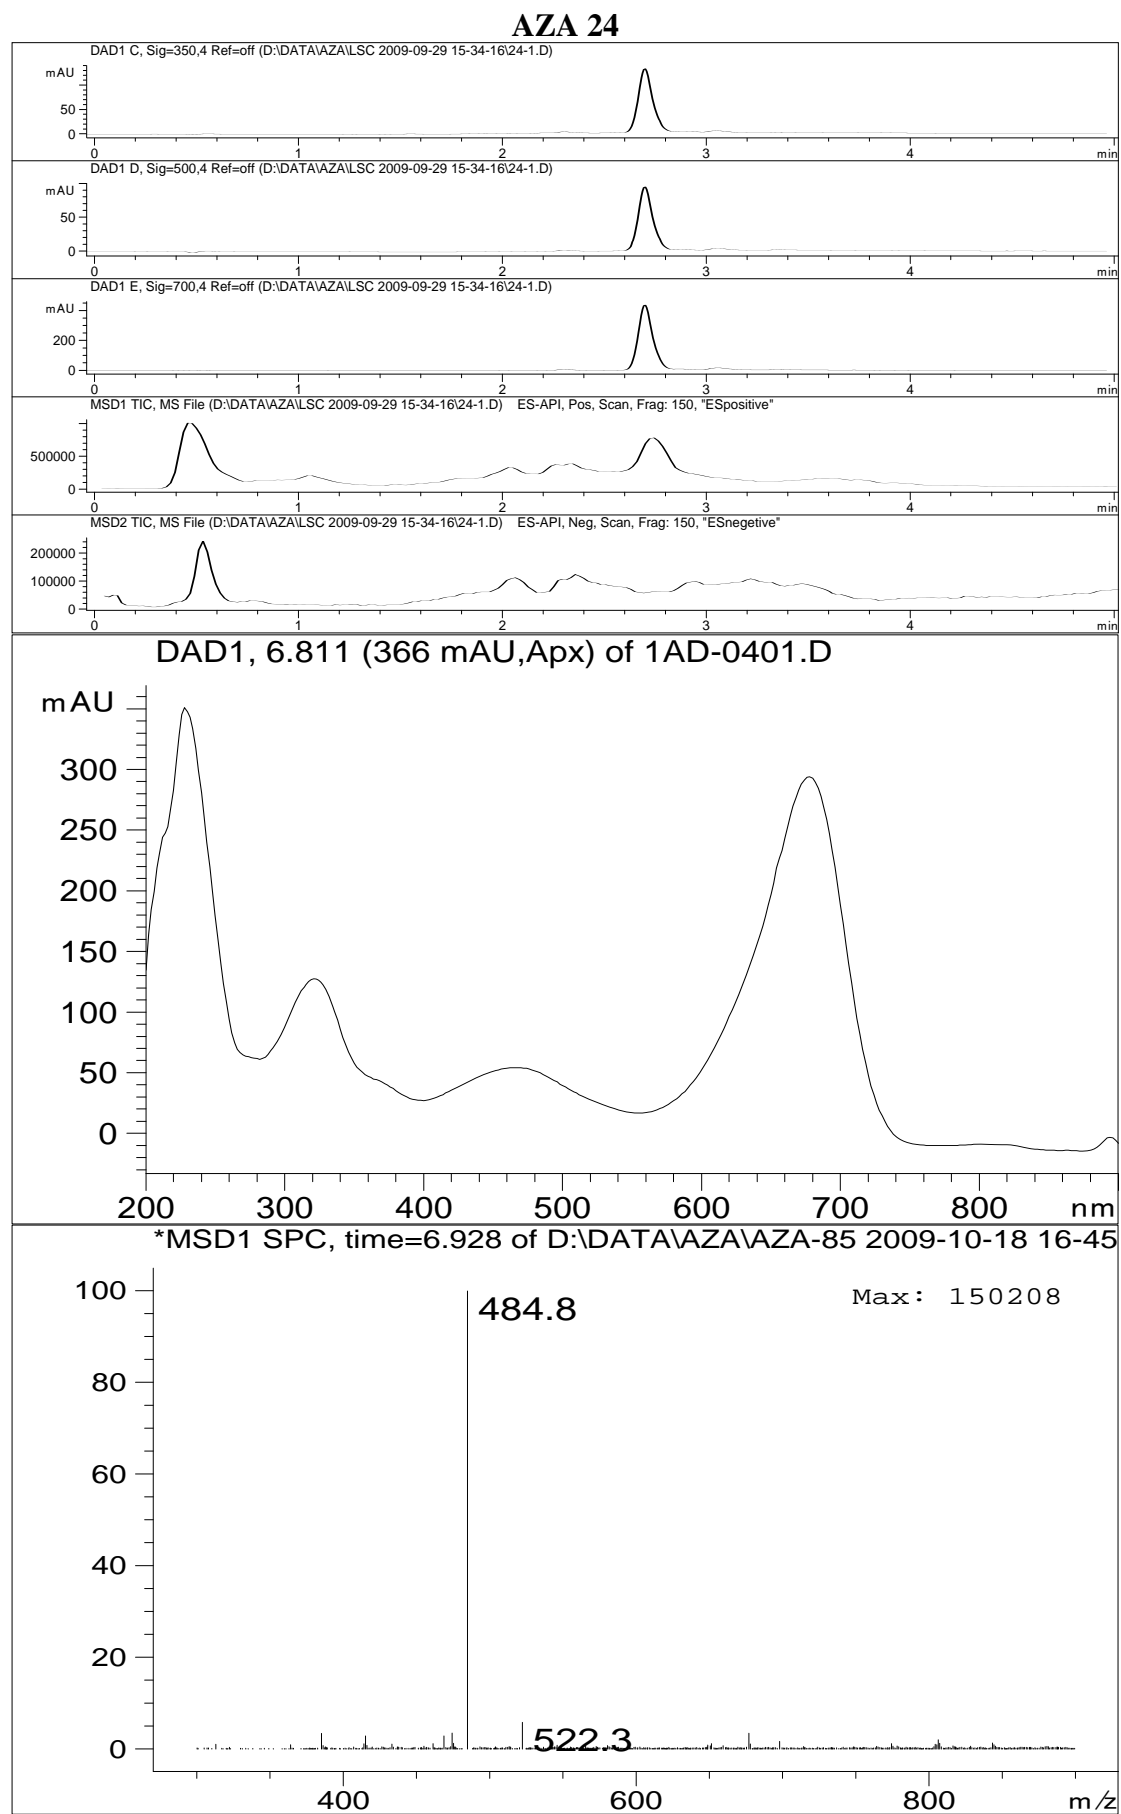

Figure S1. Cont.

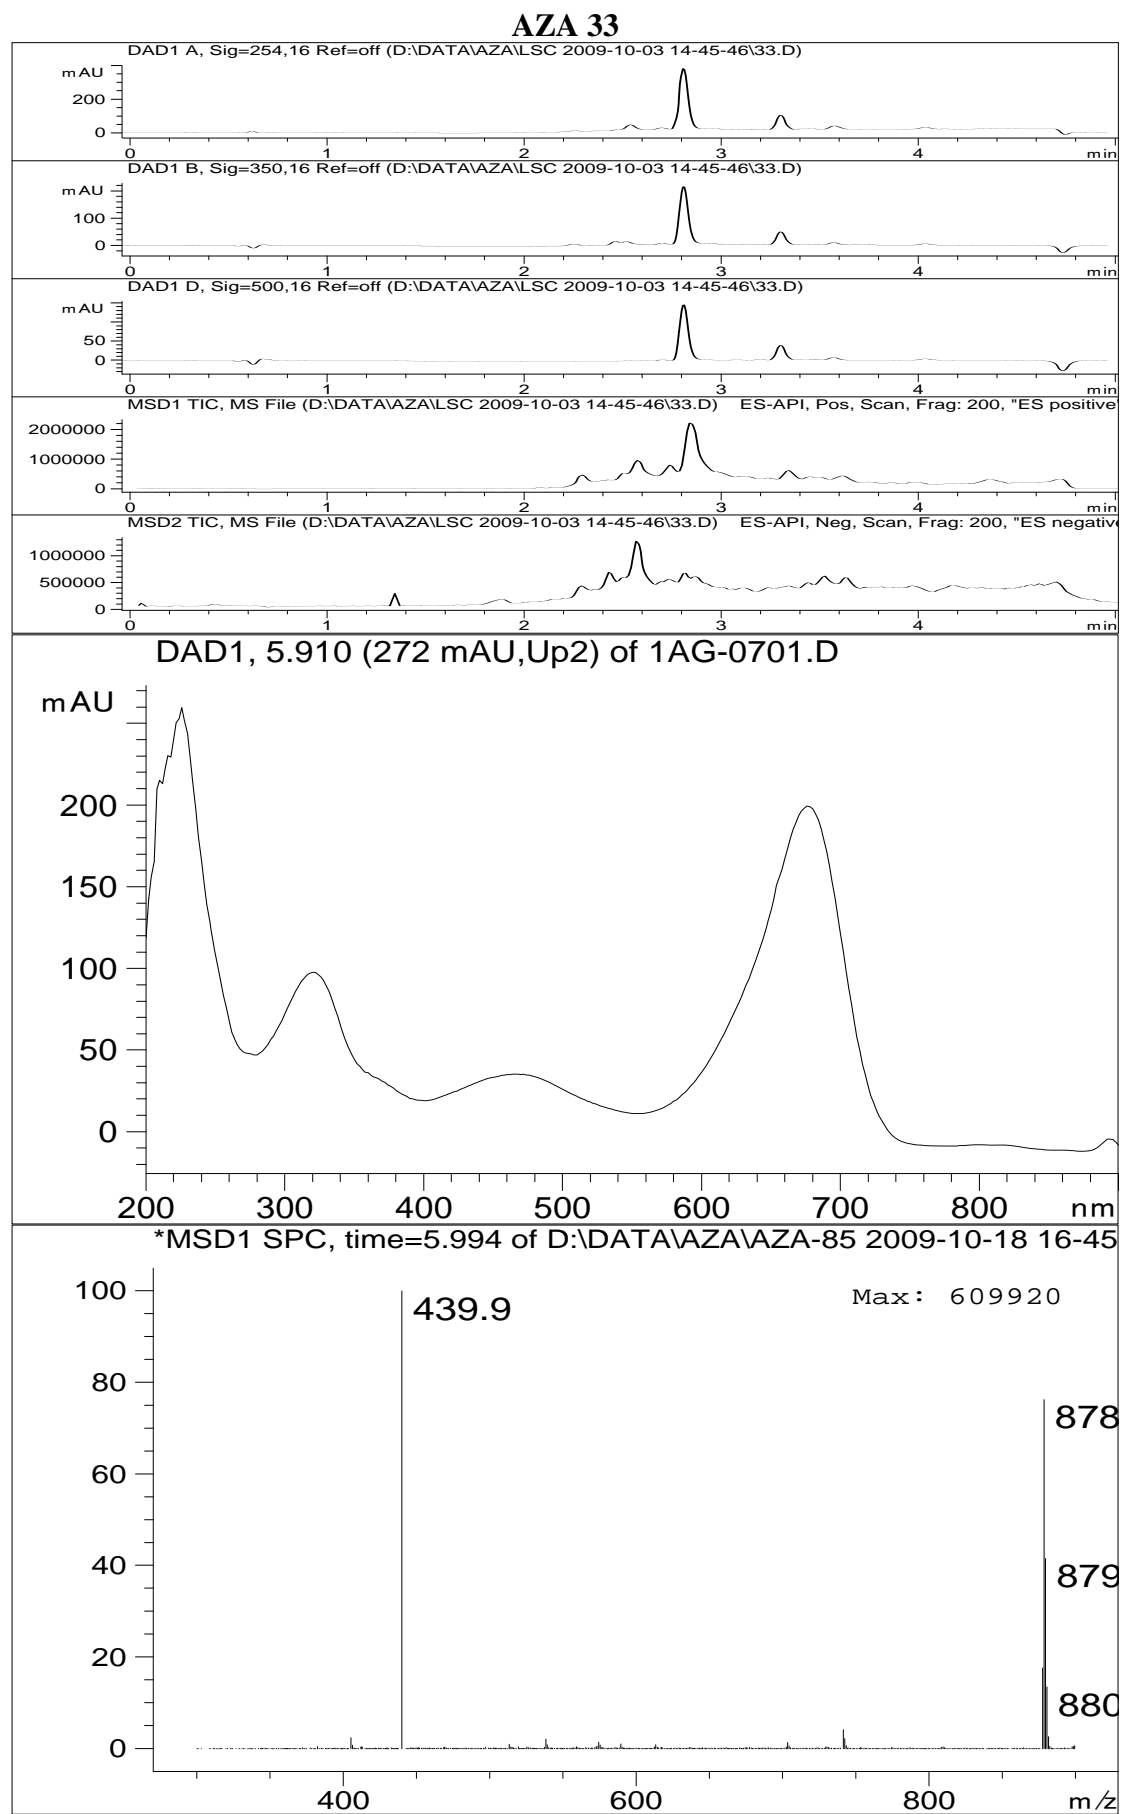

Figure S1. Cont.

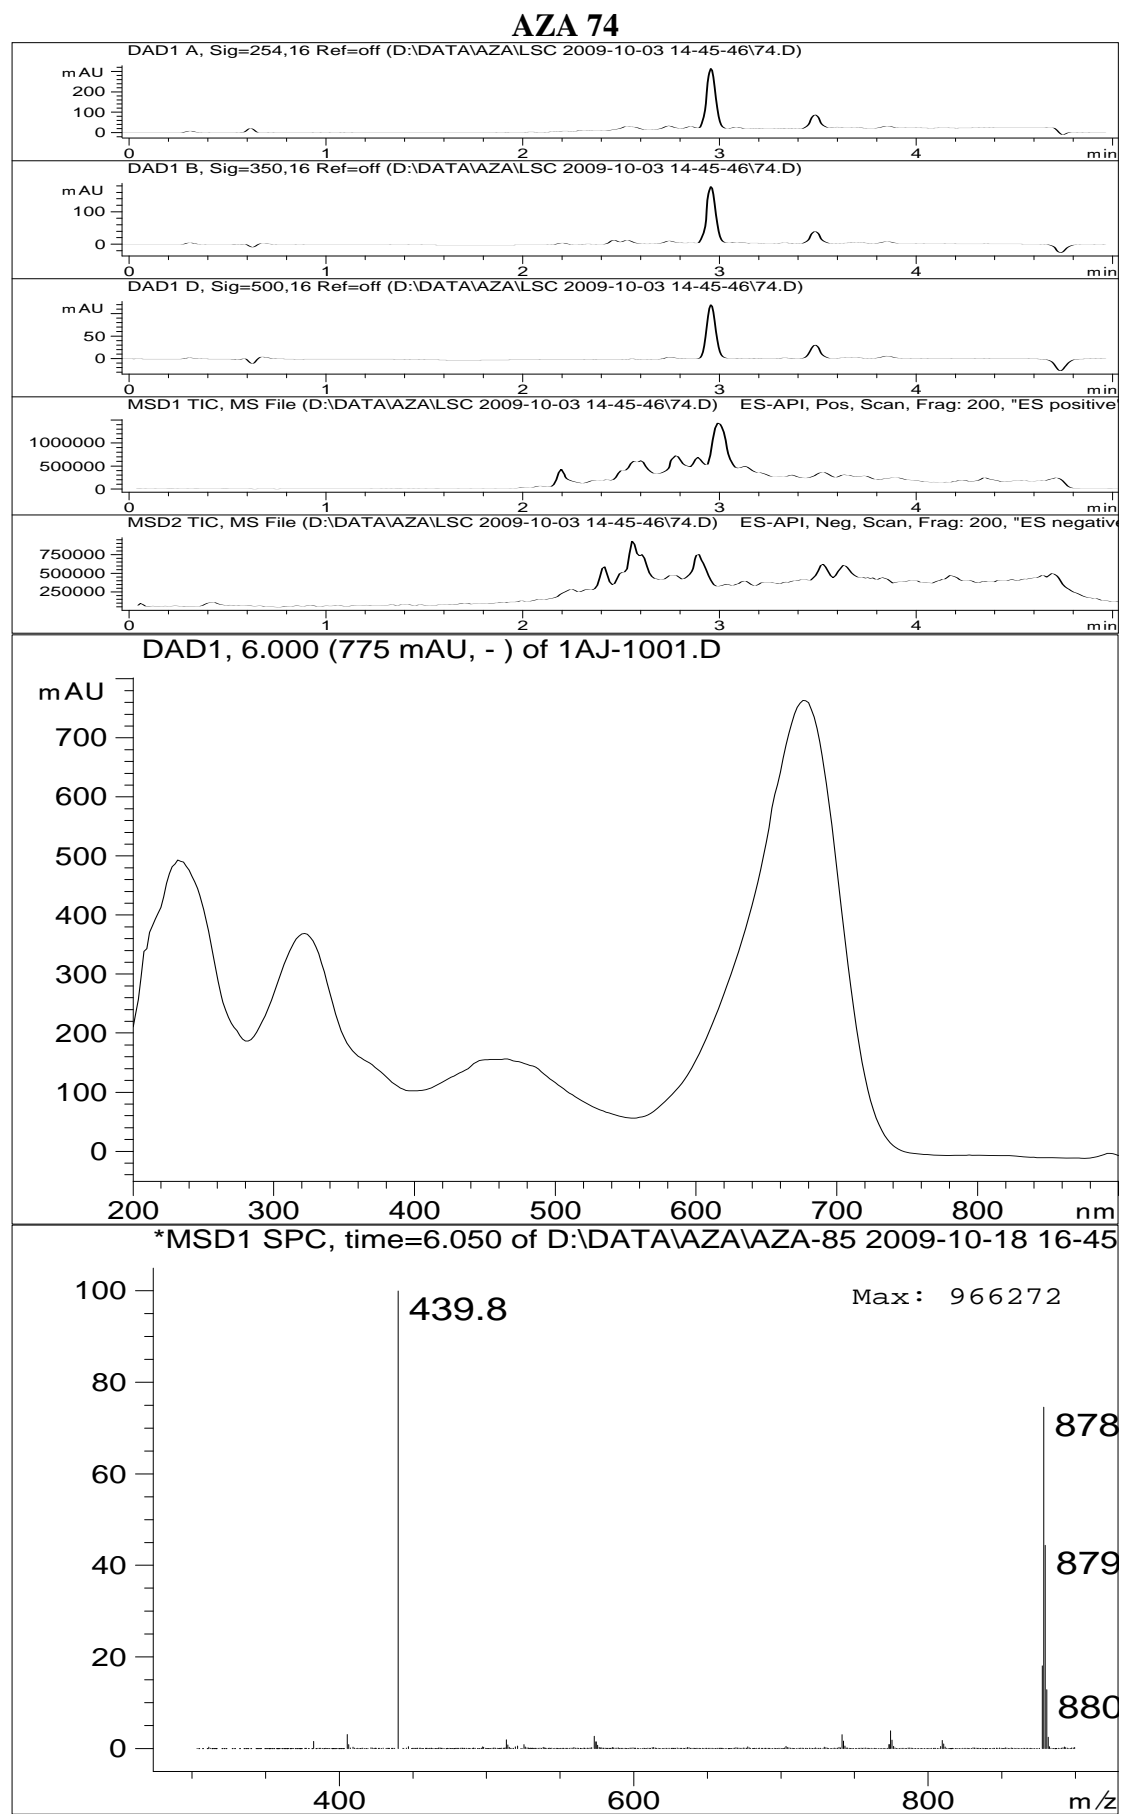

Figure S1. Cont.

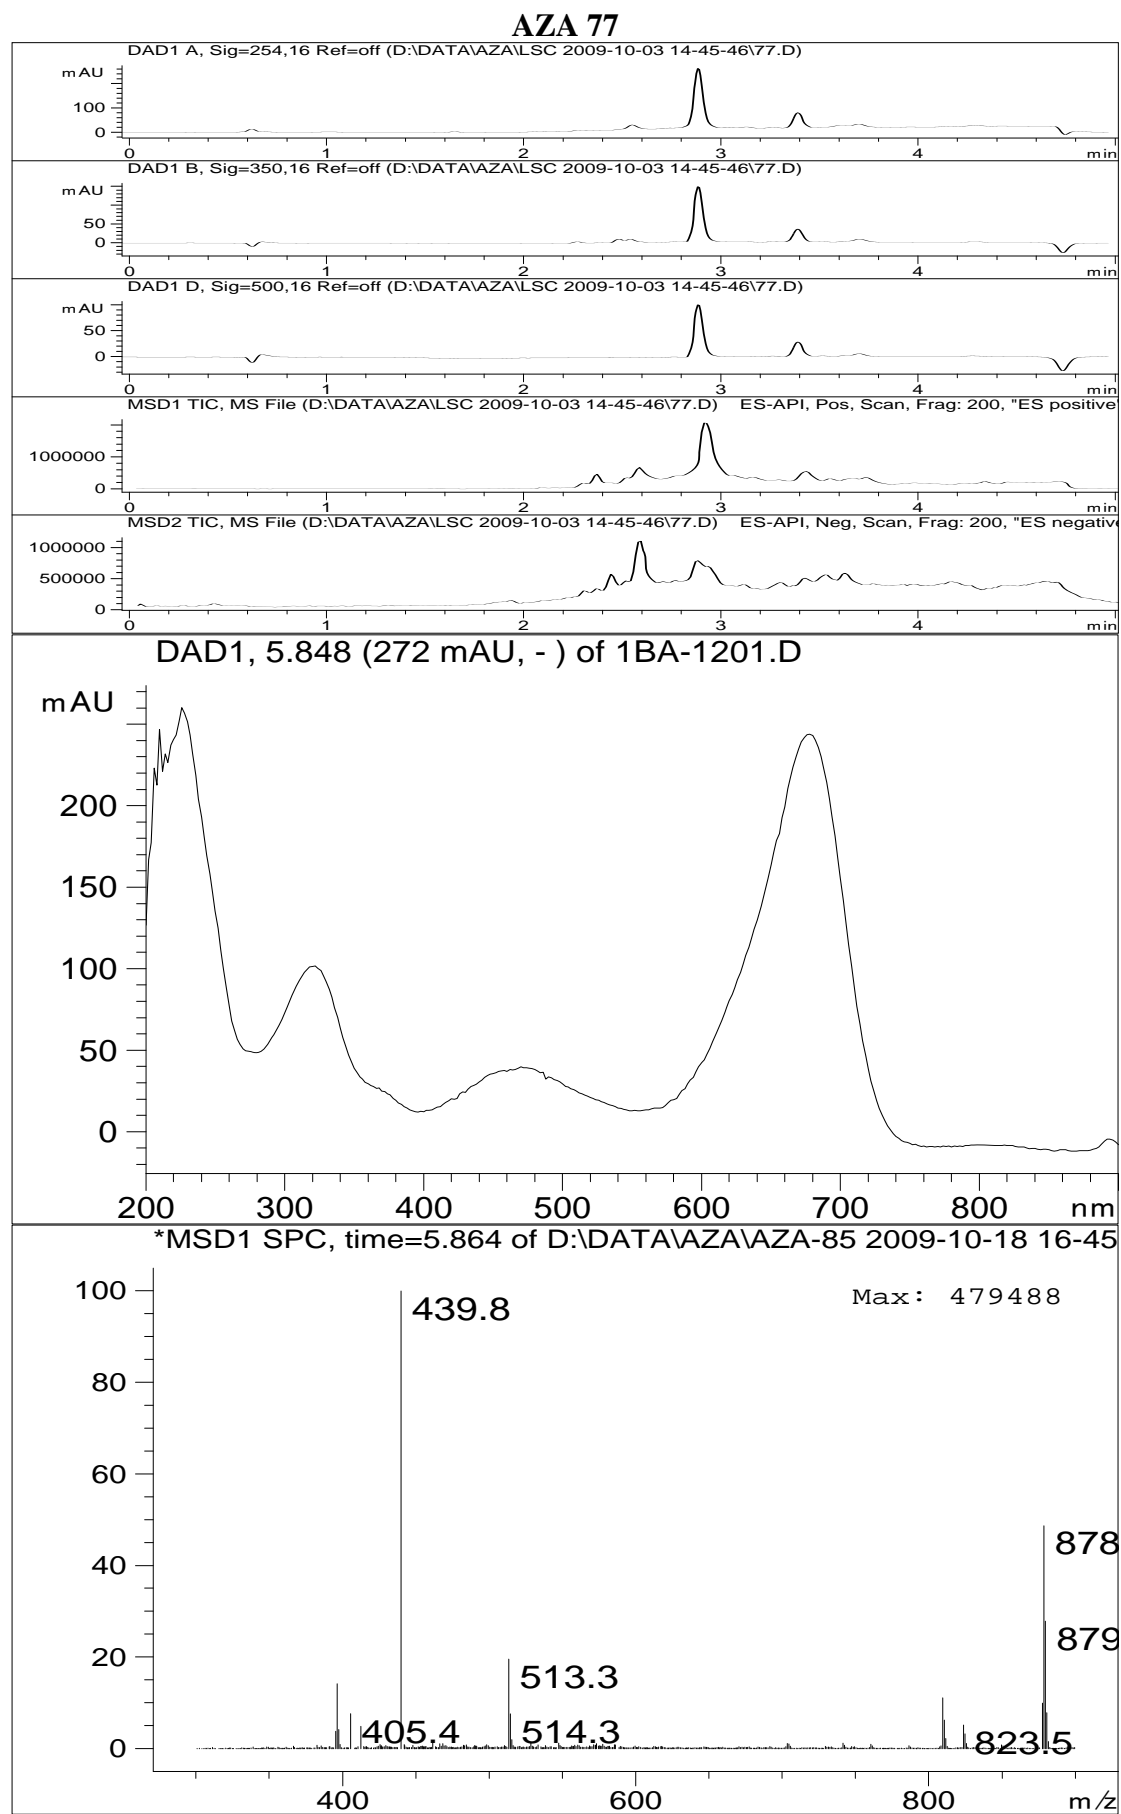

Figure S1. Cont.

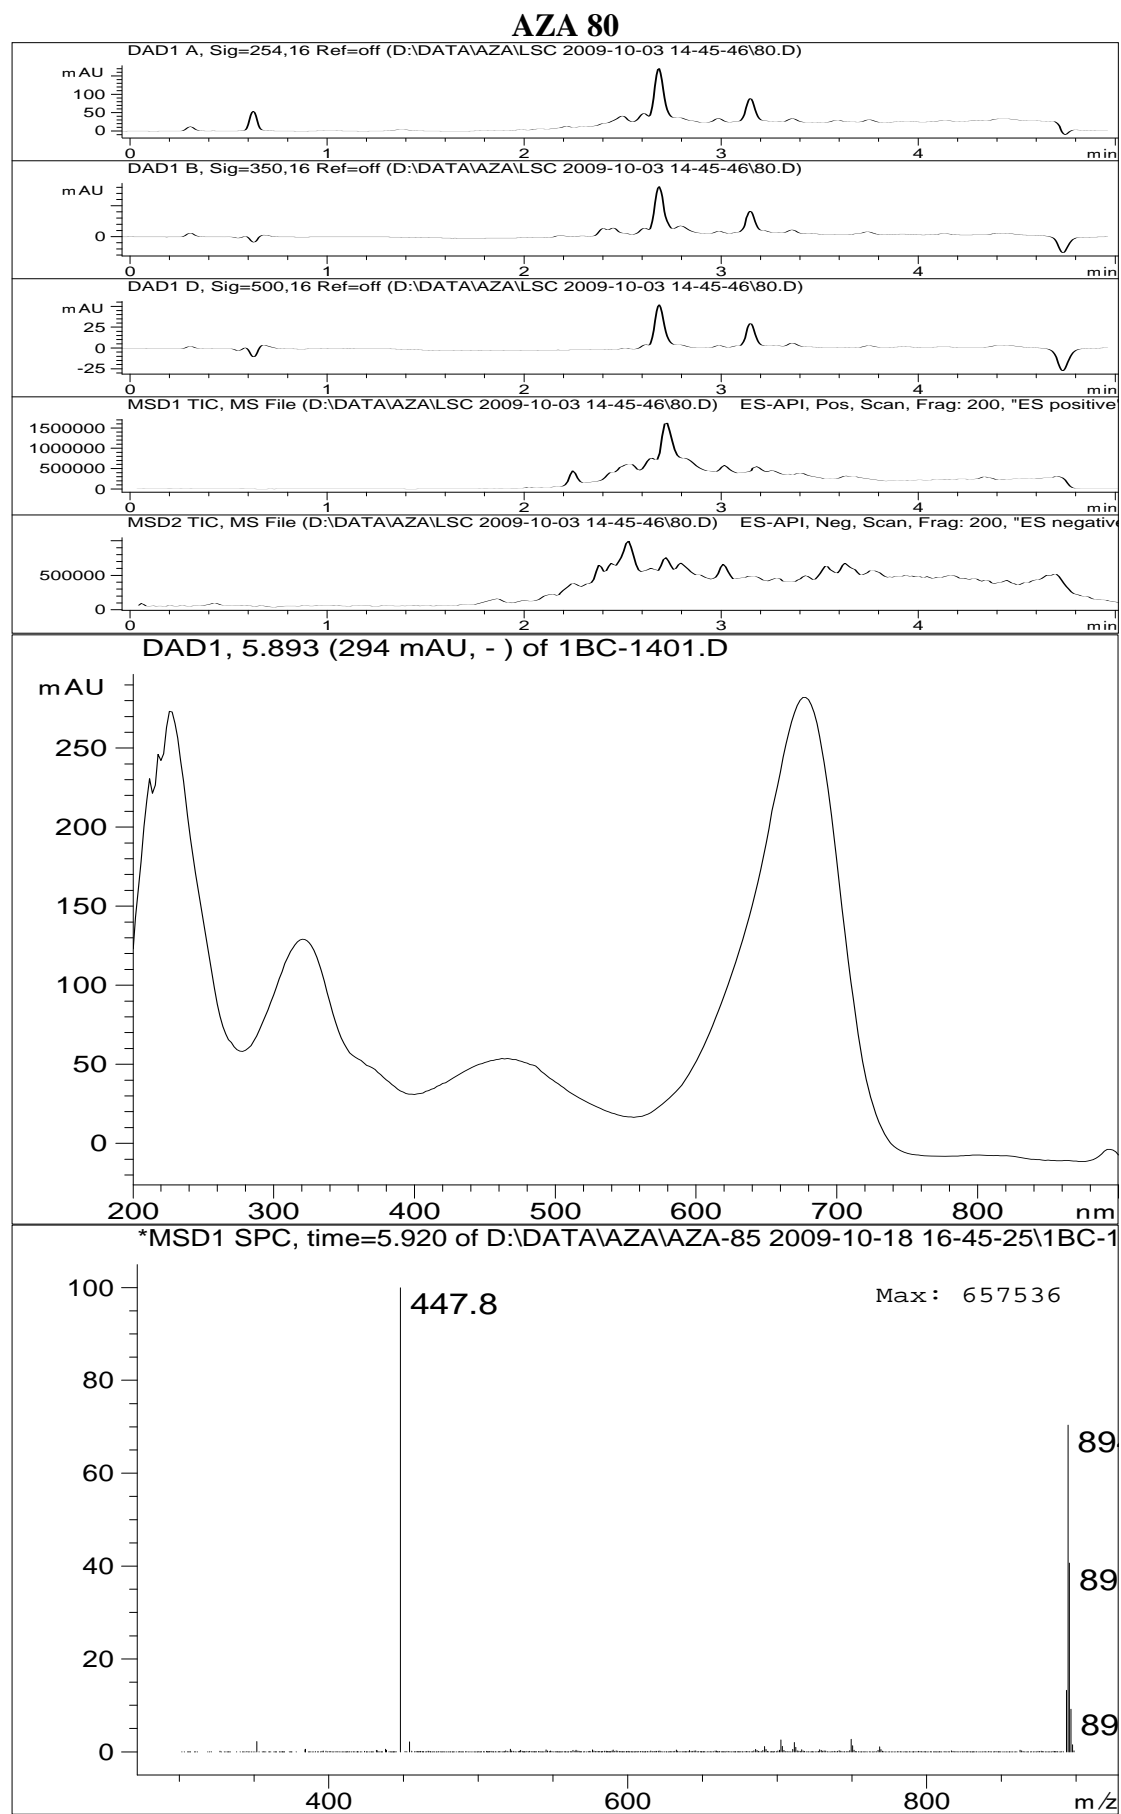

Figure S1. Cont.

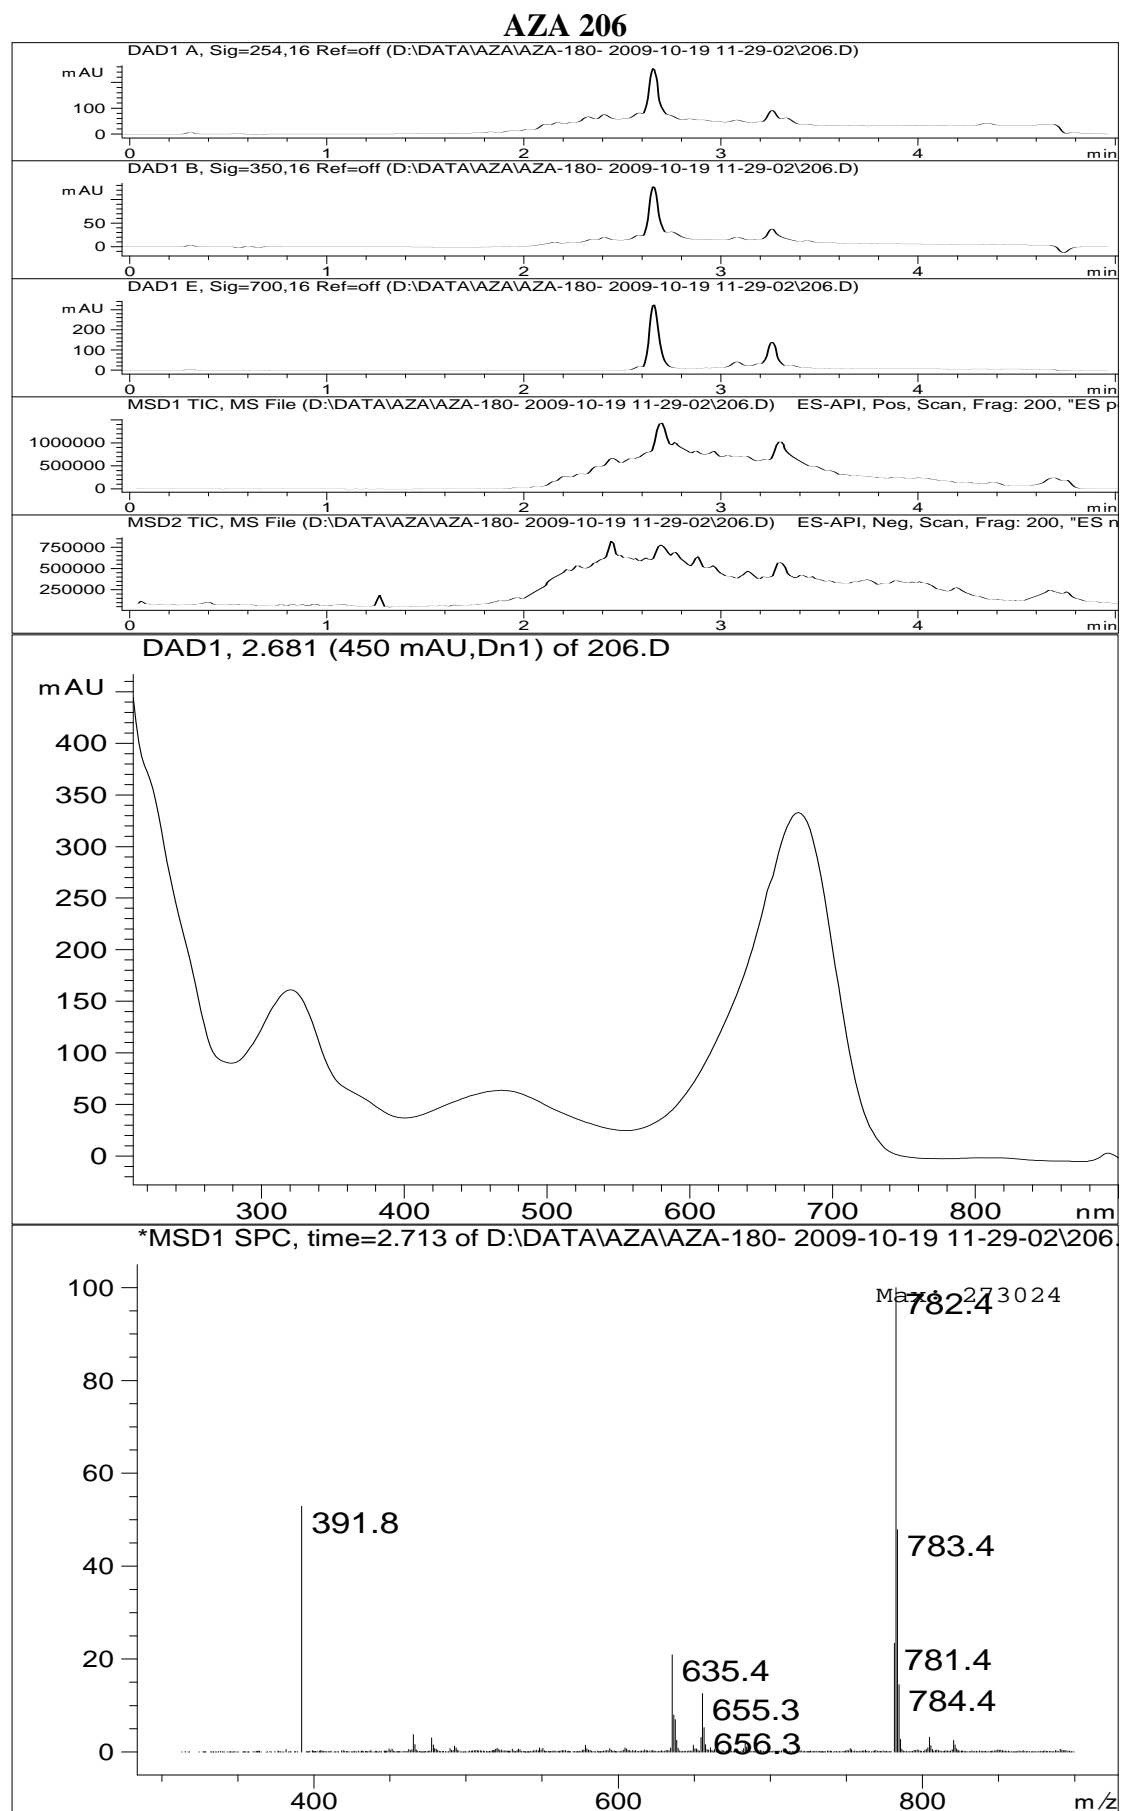

Figure S1. Cont.

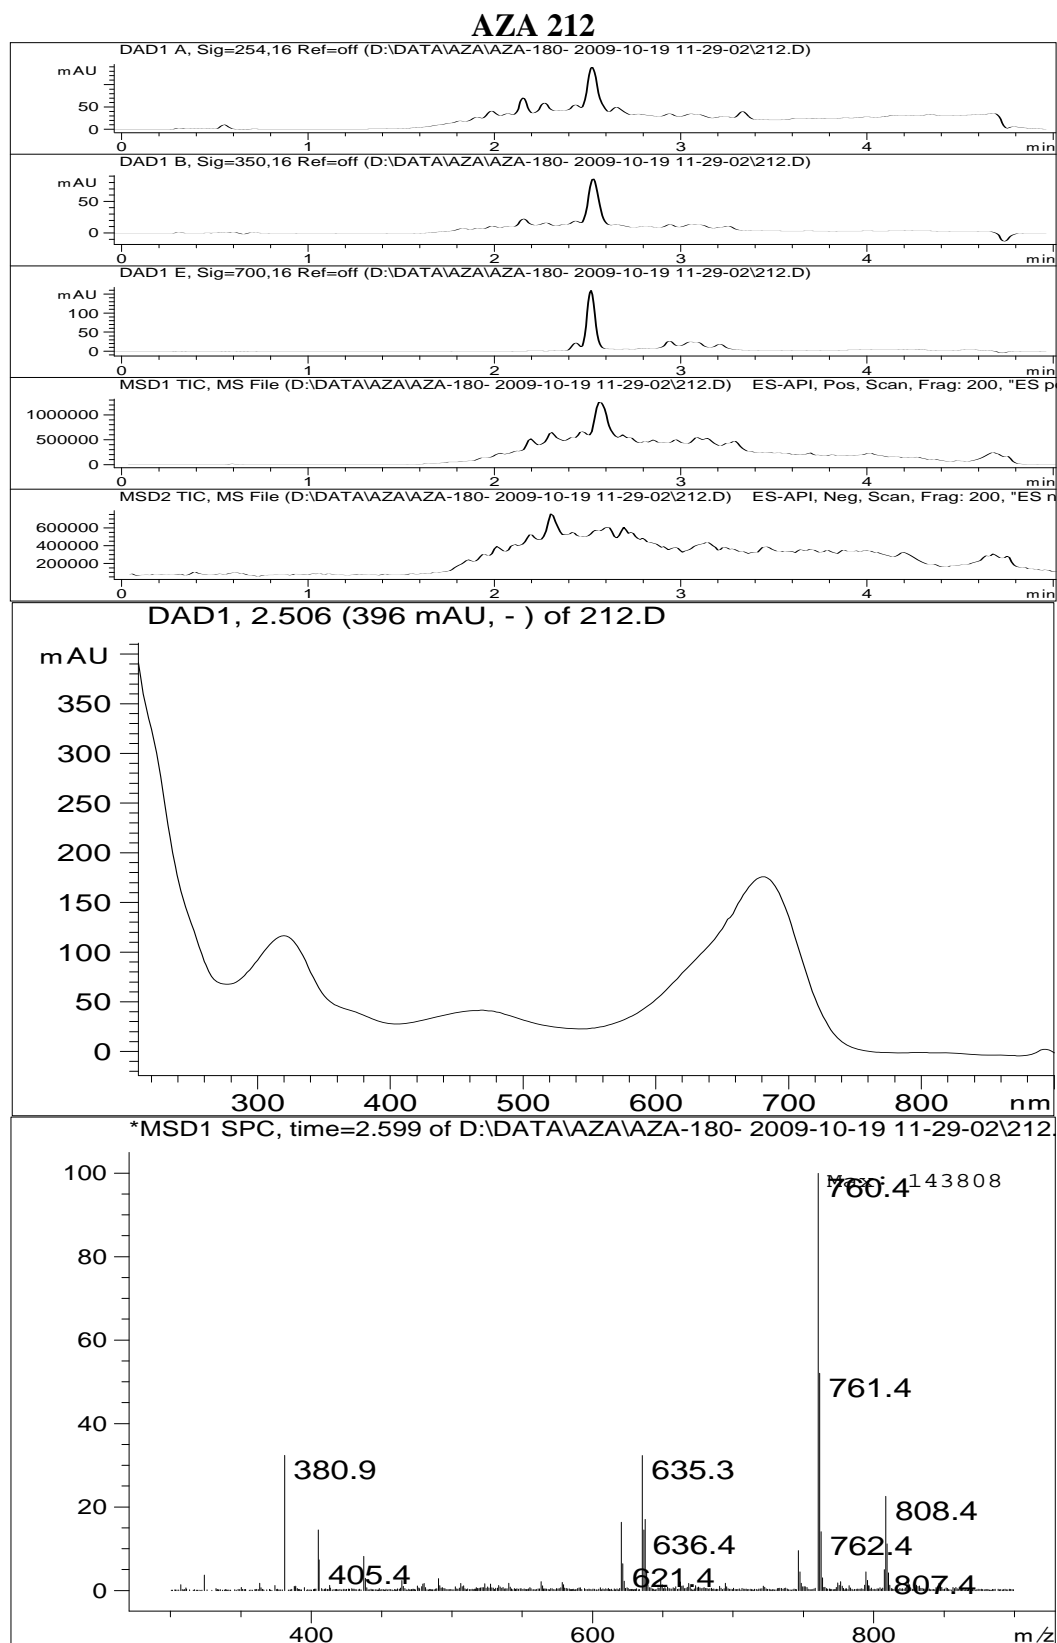

Supplement: Supplementary File 1 [file materials-06-01779-s001.pdf]
